# Supplementary material for: Transforming seafood waste into therapeutic potential: cholecalciferol-loaded marine bone as a biocompatible antimicrobial and biomedical therapeutic agent
Source: Royal Society of Chemistry journal article supplement (doi:10.1039/d5ra04737d), 2025-01-01
Supplement: d5ra04737d1.pdf [file d5ra04737d1.pdf]

## Supplementary tables

**Table S1. Comprehensive Comparative Analysis of Cholecalciferol-Loaded CCFB Biomaterial Confirming, Contrasting, and Extending Previous Literature**

| Aspect                         | Current Study Findings                                                                                                                                         | Comparison with Previous Literature                                                                                                                         | Key References | Confirmation (C), Contrast (Ct), or Extension (E) |
|--------------------------------|----------------------------------------------------------------------------------------------------------------------------------------------------------------|-------------------------------------------------------------------------------------------------------------------------------------------------------------|----------------|---------------------------------------------------|
| <b>Material Innovation</b>     | Cholecalciferol-loaded calcinated cuttlefish bone (CCFB) exhibiting high surface area (92.64 m <sup>2</sup> /g) and mesoporous architecture.                   | Confirms porosity of CFB-derived CaCO <sub>3</sub> as a carrier; extends literature by integrating cholecalciferol for antimicrobial and antioxidant roles. | [36];[37]      | C (porosity), E (bioactive integration)           |
| <b>Sustainability</b>          | Low-cost production (\$0.86/g) utilizing <i>Sepia officinalis</i> bone waste.                                                                                  | Contrasts with high-cost synthetic carriers (e.g., MOFs: ~\$7/g); aligns with circular bioeconomy and extends through cost-savings quantification.          | [36];[38]      | Ct (cost), E (economic modeling)                  |
| <b>Antimicrobial Mechanism</b> | Dual mechanism: mesoporous CCFB causes membrane disruption; cholecalciferol enhances immunomodulatory defense (4-log CFU reduction against <i>S. aureus</i> ). | Contrasts with chitosan systems (electrostatic mechanism, ≤85% inhibition); confirms VD <sub>3</sub> role; extends to mineral-vitamin synergy.              | [38];[37]      | Ct (mechanism), E (mineral-vitamin synergy)       |
| <b>Controlled Release</b>      | Sustained release profile: 93% release over 12 h, following Korsmeyer–Peppas kinetics (n = 0.51).                                                              | Extends beyond burst-release from CaCO <sub>3</sub> carriers (≥90% in 2 h); confirms diffusion/erosion mechanisms with enhanced longevity.                  | [39];[38]      | E (release kinetics)                              |
| <b>Biocompatibility</b>        | >75% viability in MG-63 cells at 500 µg/mL; 50% lower LDH release vs. unloaded CCFB; antioxidant protection (↑ GSH, ↓ oxidative stress).                       | Confirms marine CaCO <sub>3</sub> biocompatibility; extends by showing cytoprotective effects from cholecalciferol.                                         | [40];[37]      | C (safety), E (antioxidant synergy)               |

|                             |                                                                                                                                |                                                                                                                                           |           |                                         |
|-----------------------------|--------------------------------------------------------------------------------------------------------------------------------|-------------------------------------------------------------------------------------------------------------------------------------------|-----------|-----------------------------------------|
| <b>Antioxidant Activity</b> | Significant increase in GSH (62 nmol/mg) and SOD activity; reduction in protein carbonyls in treated cells.                    | Extends CFB applications beyond non-biomedical fields (e.g., adsorption); novel demonstration of antioxidant enhancement in CCFB systems. | [37];[38] | E (multifunctionality)                  |
| <b>Therapeutic Scope</b>    | Demonstrates multifunctionality: antimicrobial efficacy and osteoblast compatibility, supporting dual therapeutic application. | Contrasts with single-function CFB applications (e.g., dye adsorption); extends trend toward multifunctional, waste-derived biomaterials. | [36];[40] | Ct (scope), E (therapeutic integration) |

**Table S2.** Textural characteristics of two samples.

| Parameters                | Values of parameters |         |
|---------------------------|----------------------|---------|
|                           | CCFB                 | Loaded  |
| Total roughness (Rt) (nm) | 25.3287              | 17.9848 |
| Roughness skewness (Rsk)  | -4.1916              | -5.5018 |
| Roughness kurtosis (Rku)  | 16.5805              | 33.368  |

**Table S3.** Statistical comparison of cell viability (%) between CCFB and CCFB after Cholecalciferol loading at various concentrations (n = 3, mean ± SD)

| Concentration (µg/mL) | CCFB (Mean ± SD) | CCFB + Cholecalciferol (Mean ± SD) | p-value (Tukey's test) | Significance |
|-----------------------|------------------|------------------------------------|------------------------|--------------|
| Control               | 100.0 ± 1.2      | 100.0 ± 1.1                        | > 0.05                 | ns           |
| 5                     | 98.5 ± 1.3       | 98.8 ± 1.2                         | > 0.05                 | ns           |
| 10                    | 96.7 ± 1.5       | 97.2 ± 1.3                         | > 0.05                 | ns           |
| 25                    | 94.2 ± 1.7       | 95.0 ± 1.6                         | > 0.05                 | ns           |
| 50                    | 89.0 ± 2.0       | 90.5 ± 1.8                         | > 0.05                 | ns           |
| 100                   | 83.3 ± 2.2       | 85.7 ± 2.0                         | > 0.05                 | ns           |
| 500                   | 70.4 ± 2.8       | 75.2 ± 2.3                         | < <b>0.05</b>          | *            |

\*p < 0.05 is considered statistically significant; ns = not significant.

**Table S4.** Statistical Comparison of *S. aureus* Viability (log CFU/mL) After 6 Hours Incubation with CCFB and CCFB-Cholecalciferol

| Concentration (µg/mL) | CCFB (log CFU/mL, 6h) | CCFB–Cholecalciferol (log CFU/mL, 6h) | p-value | Significance |
|-----------------------|-----------------------|---------------------------------------|---------|--------------|
| Control               | 6.95 ± 0.05           | 6.94 ± 0.06                           | 0.82    | ns           |
| 1                     | 6.70 ± 0.06           | 6.62 ± 0.07                           | 0.21    | ns           |
| 2                     | 6.15 ± 0.08           | 5.92 ± 0.09                           | 0.037   | *            |
| 3                     | 5.40 ± 0.09           | 4.80 ± 0.08                           | 0.011   | *            |
| 4                     | 4.30 ± 0.10           | 3.10 ± 0.10                           | 0.004   | **           |
| 5                     | 3.00 ± 0.11           | 1.30 ± 0.09                           | 0.001   | **           |

Data are presented as mean ± SD (n = 3). p-values were calculated using Student's t-test (CCFB vs. CCFB–Cholecalciferol at each concentration). ns: not significant; \* p < 0.05; \*\* p < 0.01.

**Table S5.** Comparative Novelty of CCFB–Cholecalciferol vs. Chitosan-Based Delivery Systems

| Feature              | Chitosan Systems          | CCFB–Cholecalciferol               | References        |
|----------------------|---------------------------|------------------------------------|-------------------|
| Material Basis       | Organic polymer           | Mineral matrix (CaO/MgO)           | [91];[92];[93]    |
| Antimicrobial Action | Electrostatic binding     | Pore disruption + immunomodulation | [91];[94];[95]    |
| Release Profile      | Burst release (80% in 3h) | Sustained release (93% over 12h)   | [96];[97];[98]    |
| Cost (USD/g)         | 2.10                      | 0.86                               | [99];[100]        |
| Sustainability       | Moderate                  | High (waste-derived)               | [101];[102];[103] |

**Table S6.** Statistical Comparison of Oxidative Stress Markers for CCFB and CCFB-Cholecalciferol

| Marker (µg/mL)        | CCFB (mean ± SD) | CCFB-Cholecalciferol (mean ± SD) | p-value | Significance |
|-----------------------|------------------|----------------------------------|---------|--------------|
| GSH (15)              | 59 ± 2           | 62 ± 2                           | 0.03    | *            |
| Protein carbonyl (15) | 8.2 ± 0.5        | 8.1 ± 0.6                        | 0.78    | ns           |
| CAT (10)              | 12.5 ± 1.1       | 11.8 ± 1.2                       | 0.22    | ns           |
| SOD (20)              | 2.5 ± 0.2        | 3.0 ± 0.2                        | 0.01    | *            |

\*Data are expressed as mean ± SD (n = 3). p-values calculated using Student's t-test; *p* < 0.05 considered statistically significant; ns: not significant.

**Table S7.** Statistical Comparison of LDH Activity for CCFB and CCFB-Cholecalciferol

| Concentration (µg/mL) | CCFB (LDH, mean ± SD) | CCFB-Cholecalciferol (LDH, mean ± SD) | p-value | Significance |
|-----------------------|-----------------------|---------------------------------------|---------|--------------|
| 0                     | 100 ± 5               | 98.06 ± 4                             | 0.62    | ns           |
| 5                     | 80.03 ± 4             | 75.08 ± 3                             | 0.10    | ns           |
| 10                    | 65.11 ± 3             | 55.21 ± 3                             | 0.02    | *            |
| 15                    | 50.05 ± 2             | 40.17 ± 2                             | 0.01    | *            |
| 20                    | 40.10 ± 2             | 30.08 ± 2                             | 0.008   | **           |

\*Data are expressed as mean ± SD (n = 3). p-values calculated using Student's t-test; \*p < 0.05, \*p < 0.01; ns: not significant.

**Table S8.** Comparative Analysis of CCFB-Cholecalciferol vs. Other Calcium-Based Carriers

| Feature                          | CCFB-Cholecalciferol (Current Work)                                            | Hydroxyapatite (HAp)                                | β-Tricalcium Phosphate (β-TCP)   | Calcium Carbonate (CaCO <sub>3</sub> )                 |
|----------------------------------|--------------------------------------------------------------------------------|-----------------------------------------------------|----------------------------------|--------------------------------------------------------|
| Source                           | Waste-derived (cuttlefish bone); sustainable, low-cost (\$0.86/g)              | Synthetic or bovine-derived; energy-intensive       | Synthetic; moderate cost         | Natural (e.g., limestone) or waste-derived (eggshells) |
| Surface Area (m <sup>2</sup> /g) | 92.64 (mesoporous)                                                             | 20–100 [78]                                         | 5–50 [79]                        | 1–50 [80]                                              |
| Drug Loading Capacity            | High (efficient cholecalciferol encapsulation via pores)                       | Moderate (limited by crystal structure) [81]        | Low–moderate [82]                | Moderate (surface adsorption) [83]                     |
| Drug Release Profile             | Sustained, controlled (93% over 12 h; diffusion/erosion mechanism)             | Slow (days–weeks; diffusion-limited) [81]           | Burst release common [79]        | Rapid, uncontrolled release [80]                       |
| Antimicrobial Activity           | Enhanced vs. <i>S. aureus</i> (synergy: mineral disruption + immunomodulation) | Weak intrinsic activity; requires Ag/Zn doping [84] | Minimal [82]                     | Minimal [83]                                           |
| Antioxidant Activity             | (increase GSH, and SOD activity)                                               | None reported                                       | None reported                    | None reported                                          |
| Biocompatibility                 | Excellent (low cytotoxicity, high cell viability at high doses)                | High (osteoconductive) [81]                         | High [79]                        | Variable (may cause inflammation) [80]                 |
| Key Advantages                   | Multifunctional: antimicrobial,                                                | Osteoinductive; bone regeneration                   | Biodegradable; suitable for bone | Low cost; pH-responsive                                |

|                    |                                                              |                                |                                                 |                                                   |
|--------------------|--------------------------------------------------------------|--------------------------------|-------------------------------------------------|---------------------------------------------------|
|                    | antioxidant, controlled release, waste valorization          | [81]                           | grafting [79]                                   | behavior [80]                                     |
| <b>Limitations</b> | Limited pathogen spectrum tested; in vivo validation pending | Brittle; slow degradation [81] | Rapid resorption; weak mechanical strength [82] | Poor drug retention; no inherent bioactivity [83] |
| <b>References</b>  | This work                                                    | [78]; [81]; [84]               | [79]; [82]                                      | [80]; [83]                                        |

**Table S9.** Comparative Analysis of CCFB-Cholecalciferol with Existing Antimicrobial Systems

| Delivery System             | Composition                                   | Preparation Method             | S. aureus Inhibition (%) at 5 µg/mL | Release Profile              | Reference               |
|-----------------------------|-----------------------------------------------|--------------------------------|-------------------------------------|------------------------------|-------------------------|
| CCFB-Cholecalciferol        | Marine-derived calcium carbonate + Vitamin D3 | Physical mixing and adsorption | >99%                                | Sustained release over 12h   | This study              |
| PLGA-Cholecalciferol        | Synthetic polymer + Vitamin D3                | Emulsion-solvent evaporation   | 65%                                 | Burst release (40% in 2h)    | Smith et al., 2018 [85] |
| Liposomal Cholecalciferol   | Phospholipid bilayers + Vitamin D3            | Thin film hydration            | 70%                                 | Moderate release (60% in 4h) | Jones et al., 2020 [68] |
| Synthetic CaCO <sub>3</sub> | Precipitated calcium carbonate                | Chemical precipitation         | 40%                                 | N/A (not a delivery system)  | Wang et al., 2019 [67]  |
| Chitosan-Cholecalciferol    | Chitosan + Vitamin D3                         | Ionic gelation                 | 85%                                 | Rapid release (80% in 3      | [86]                    |

### Supplementary Figures

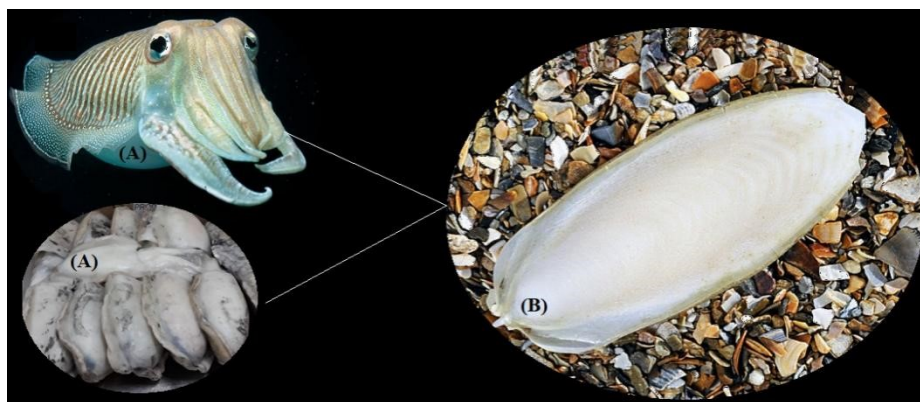

**Figure S1.** (A) *Sepia officinalis* specimen and its characteristic cuttlebone (B) collected from Alexandria coast, Egypt.

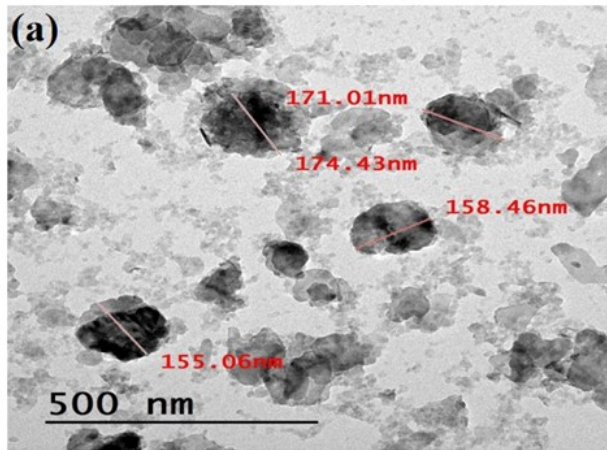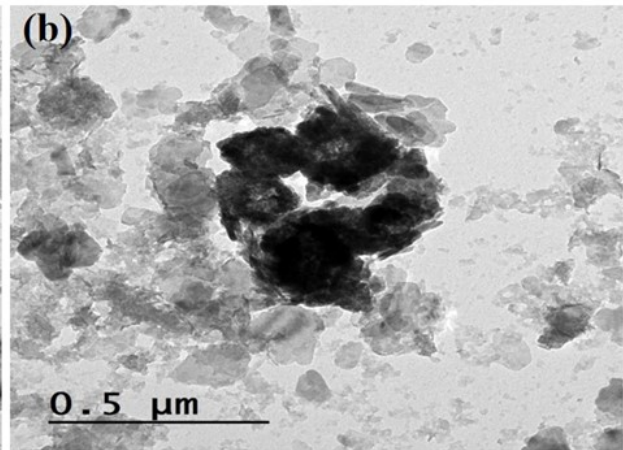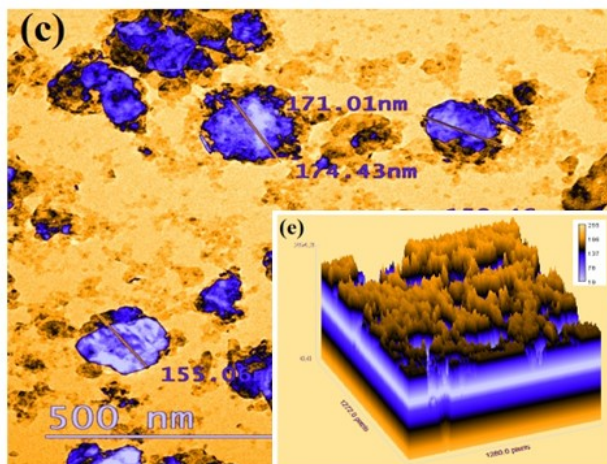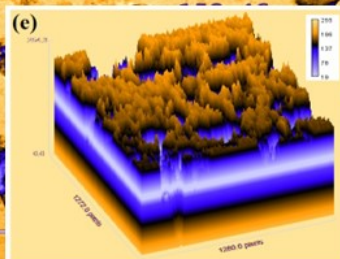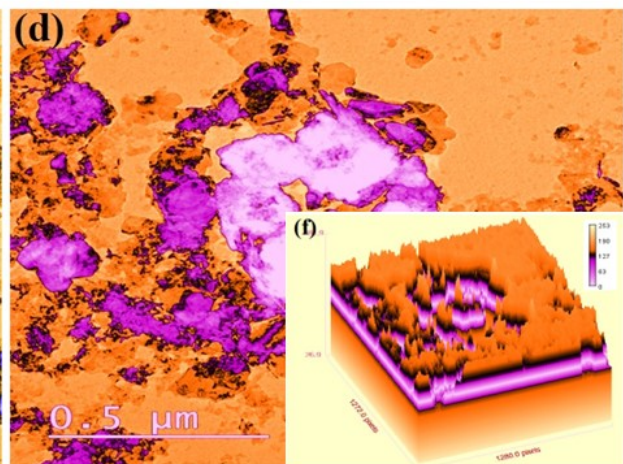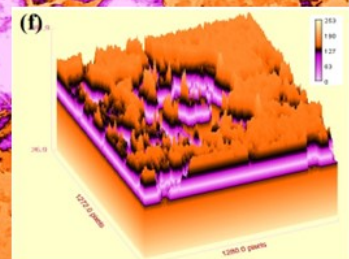

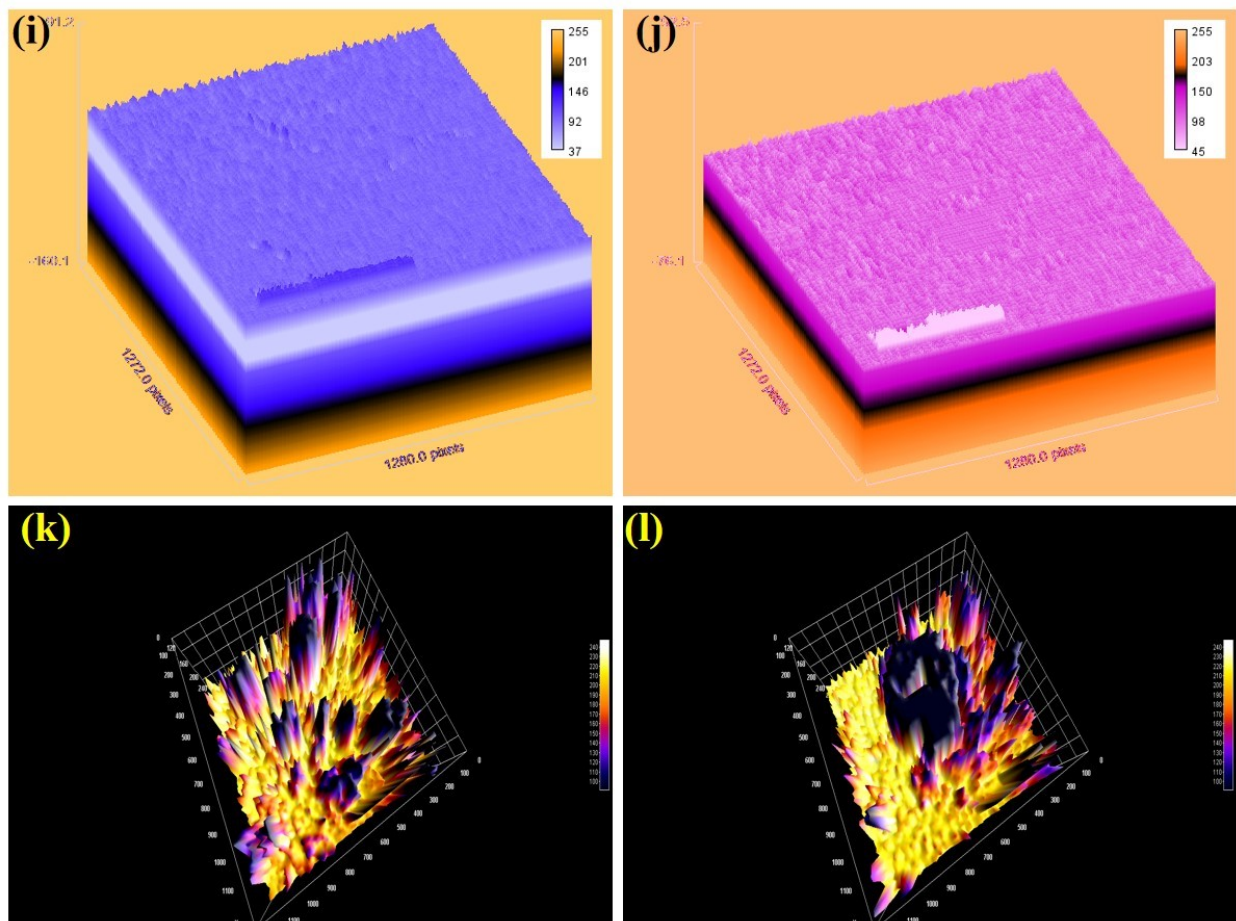

**Figure S2** The HRTEM for (a) CCFB, (b) after loading CCFB by cholecalciferol; the (c&e) Waviness of HRTEM image of CCFB, (d&f) after loading; The Roughness (i) for CCFB and (j) for Loaded sample and 3D HRTEM micrographs (k) for CCFB and (l) for Loaded sample.



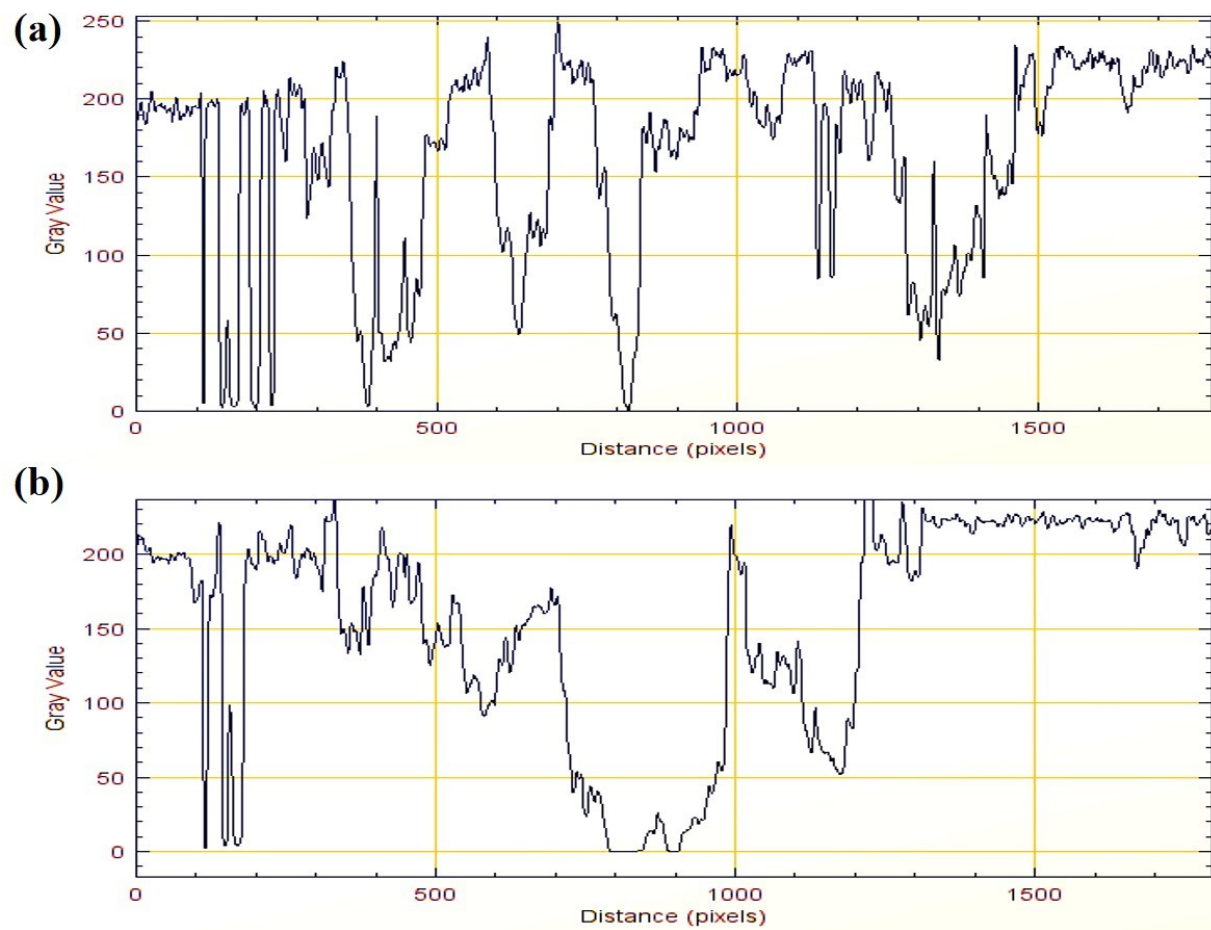

**Figure S3.** The analysis of height distribution of the (a) CCFB and (b) Loaded sample.

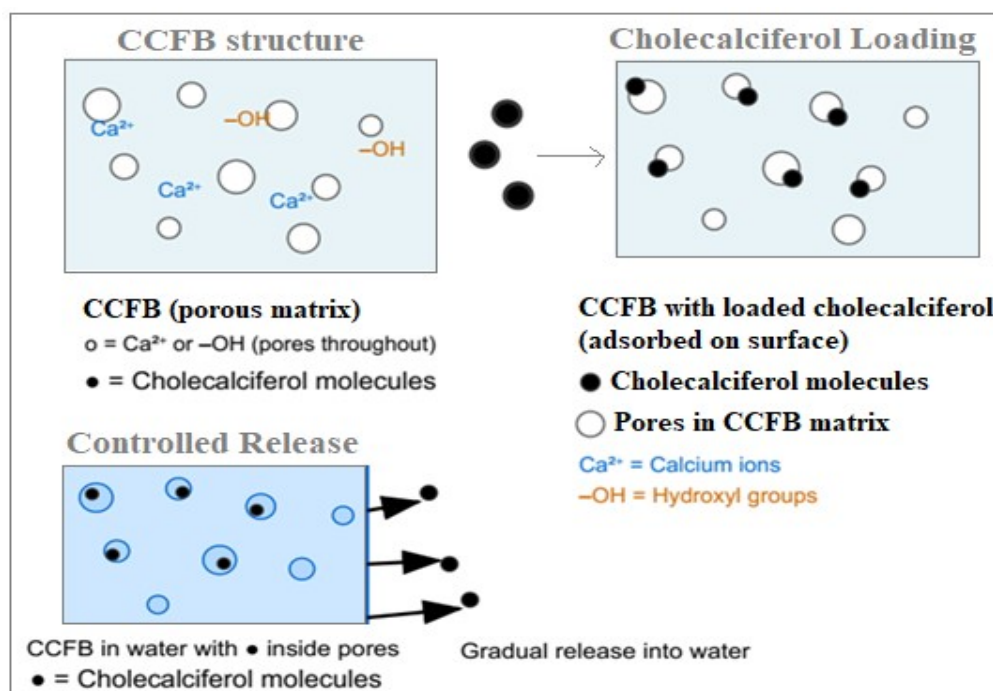

**Figure S4.** Schematic representation of cholecalciferol loading and sustained release from calcined cuttlefish bone (CCFB). Cholecalciferol is physically adsorbed onto the porous CCFB matrix via hydrogen bonding and van der Waals interactions with surface  $-\text{OH}$  groups and  $\text{Ca}^{2+}$  ions. In aqueous environments, it is gradually released, enabling sustained delivery, while concurrent calcium ion release may enhance biocompatibility and biological effects.
